# Supplementary material
Source: PubMed Central journal article supplement (PMC8111145)
Supplement: JCM.02589-20-s0001.pdf [file JCM.02589-20-s0001.pdf]

**Supplementary Table 1:** Comparison of rapid antigen detection tests for which evaluations have been published to date

| <b>RAD test name</b>                 | <b>Manufacturer</b>             | <b>Test type</b>                     | <b>Number of tested specimens</b> | <b>Sensitivity (%)</b> | <b>Specificity (%)</b> | <b>Other characteristics</b>     | <b>References</b> |
|--------------------------------------|---------------------------------|--------------------------------------|-----------------------------------|------------------------|------------------------|----------------------------------|-------------------|
| COVID-19 Ag Respi-strip              | Coris BioConcept, Belgium       | Immunochromatography                 | 60 – 148*                         | 30.2-57.6              | 99.5-100               |                                  | (3,6,9)           |
| Biocredit COVID-19 Ag test           | RapiGEN, Republik of Korea      | Immunochromatography                 | 368                               | 45.7                   | 100                    |                                  | (5)               |
| STANDARD F COVID-19 Ag FIA           | SD Biosensor, Republik of Korea | Fluorescence immunoassay             | 359                               | 47.1                   | na                     | Requires a fluorescence analyzer | (4)               |
| STANDARD Q COVID-19 Ag               | SD-Biosensor, Republik of Korea | Immunochromatography                 | 330                               | 70.6                   | 100                    |                                  | (1)               |
| SARS-CoV-2 antigen test              | Bioeasy Biotechnology, China    | Fluorescence immunochromatography    | 127                               | 93.9                   | 100                    | Requires a fluorescence analyzer | (8)               |
| Lumipulse G SARS-CoV-2 Ag            | Fujirebio, Japan                | Chemiluminescence enzyme immunoassay | 313                               | 55.2-91.7              | 97.3-99.6              | Requires a fluorescence analyzer | (2,7)             |
| PANBIO COVID-19 Ag Rapid Test Device | Abbott, USA                     | Immunochromatography                 | 341                               | 75.5                   | 94.9                   |                                  | This study        |

RAD: rapid antigen detection; \* depending on studies; na: not available; the antigen detected was a nucleocapsid protein in all tests except the Lumipulse G SARS-CoV-2 Ag for which this information is not available.

**Supplementary Table 2:** Results from the PANBIO COVID-19 Rapid Ag test according to the Ct values obtained by RT-PCR

|              |            | RT-PCR Ct value | 9 | 10 | 11 | 12 | 13 | 14 | 15 | 16 | 17 | 18 | 19 | 20 | 21 | 22 | 23 | 24 | 25 | 26 | 27 | 28 | 29 | 30 | 31 | 32 | 33 | 34 |   |
|--------------|------------|-----------------|---|----|----|----|----|----|----|----|----|----|----|----|----|----|----|----|----|----|----|----|----|----|----|----|----|----|---|
| Patients     | RAD result |                 |   |    |    |    |    |    |    |    |    |    |    |    |    |    |    |    |    |    |    |    |    |    |    |    |    |    |   |
| Symptomatic  | positive   | 1               |   | 1  | 2  |    | 5  | 11 | 9  | 7  | 5  | 3  | 14 | 14 | 8  | 7  |    | 19 | 5  | 9  | 10 | 5  | 2  | 2  | 1  | 2  | 2  |    |   |
|              | negative   |                 |   |    |    | 1  |    |    |    |    |    |    |    |    |    |    |    | 1  | 2  |    |    | 2  | 5  | 5  | 5  | 8  | 5  | 4  |   |
| Asymptomatic | positive   |                 |   |    |    |    |    |    |    |    |    |    |    |    |    |    |    |    | 1  | 1  |    | 1  | 4  | 2  |    |    |    | 1  |   |
|              | negative   |                 |   |    |    |    |    |    |    |    |    |    |    |    |    |    |    |    |    |    | 1  | 1  |    |    |    | 2  | 1  | 4  | 3 |

## References

1. Cerrutti F, Burdino E, Milia MG, Alice T, Gregori, G, Bruzzone B, Ghisetti V. 2020. Urgent need of rapid tests for SARS-CoV-2 antigen detection: evaluation of the SD-Biosensor antigen test for SARS-Cov-2. *J Clin Virol* 132:104654. <https://doi.org/10.1016/j.jcv.2020.104654>
2. Hirotsu Y, Maejima M, Shibusawa M, Nagakubo Y, Hosaka K, Amemiya K, Sueki H, Hayakawa M, Mochizuki H, Tsutsui T, Kakizaki Y, Miyashita Y, Yagi S, Kojima S, Omata M. 2020. Comparison of automated SARS-CoV-2 antigen test for COVID-19 infection with quantitative RT-PCR using 313 nasopharyngeal swabs, including from seven serially followed patients. *Int J Infect Dis* 99:397-402. <https://doi.org/10.1016/j.ijid.2020.08.029>.
3. Lambert-Niclot S, Cuffel A, Le Pape S, Vauloup-Fellous C, Morand-Joubert L, Roque-Afonso AM, Le Goff J, Delaugerre C. 2020. Evaluation of a Rapid Diagnostic Assay for Detection of SARS-CoV-2 Antigen in Nasopharyngeal Swabs. *J Clin Microbiol* 58:e00977-20. <https://doi.org/10.1128/JCM.00977-20>.
4. Liotti FM, Menchinelli G, Lalle E, Palucci I, Marchetti S, Colavita F, La Sorda F, Sberna G, Bordi L, Sanguinetti M, Cattani P, Capobianchi MR, Posteraro B. 2020. Performance of a novel diagnostic assay for rapid SARS-CoV-2 antigen detection in nasopharynx samples. *Clin Microbiol Infect* epub. <https://doi.org/10.1016/j.cmi.2020.09.030>.
5. Mak GC, Cheng PL, Lau SS, Wong KK, Lau CS, Lam ET, Chan RC, Tsang DN. 2020. Evaluation of rapid antigen test for detection of SARS-CoV-2 virus. *J Clin Virol* 129:104500. <https://doi.org/10.1016/j.jcv.2020.104500>.
6. Mertens P, De Vos N, Martiny D, Jassoy C, Mirazimi A, Cuypers L, Van den Wijngaert S, Monteil V, Melin P, Stoffels K, Yin N, Mileto D, Delaunoy S, Magein H, Lagrou K, Bouzet J, Serrano G, Wautier M, Leclipteux T, Van Ranst M, Vandenberg O. 2020. Development and potential usefulness of the COVID-19 Ag Respi-Strip Diagnostic assay in a pandemic context. *Front Med (Lausanne)* 7:225. <https://doi.org/10.3389/fmed.2020.00225>.
7. Ogawa T, Fukumori T, Nishihara Y, Sekine T, Okuda N, Nishimura T, Fujikura H, Hirai N, Imakita N, Kasahara K. 2020. Another false-positive problem for a SARS-CoV-2 antigen test in Japan. *J Clin Virol* 131:104612. <https://doi.org/10.1016/j.jcv.2020.104612>.
8. Porte L, Legarraga P, Vollrath V, Aguilera X, Munita JM, Araos R, Pizarro G, Vial P, Iruretagoyena M, Dittrich S, Weitzel T. 2020. Evaluation of a novel antigen-based rapid detection test for the diagnosis of SARS-CoV-2 in respiratory samples. *Int J Infect Dis* 99:328-333. <https://doi.org/10.1016/j.ijid.2020.05.098>.
9. Scohy A, Anantharajah A, Bodeus M, Kabamba-Mukadi B, Verroken A, Rodriguez-Villalobos H. 2020. Low performance of rapid antigen detection test as frontline testing for COVID-19 diagnosis. *J Clin Virol* 129:104455. <https://doi.org/10.1016/j.jcv.2020.104455>.
